# Supplementary material
Source: Springer Nature journal article supplement (https://www.springermedizin.de/resource/supplementary/12943_2010_811_MOESM3_ESM.pdf/9554886)

**A.**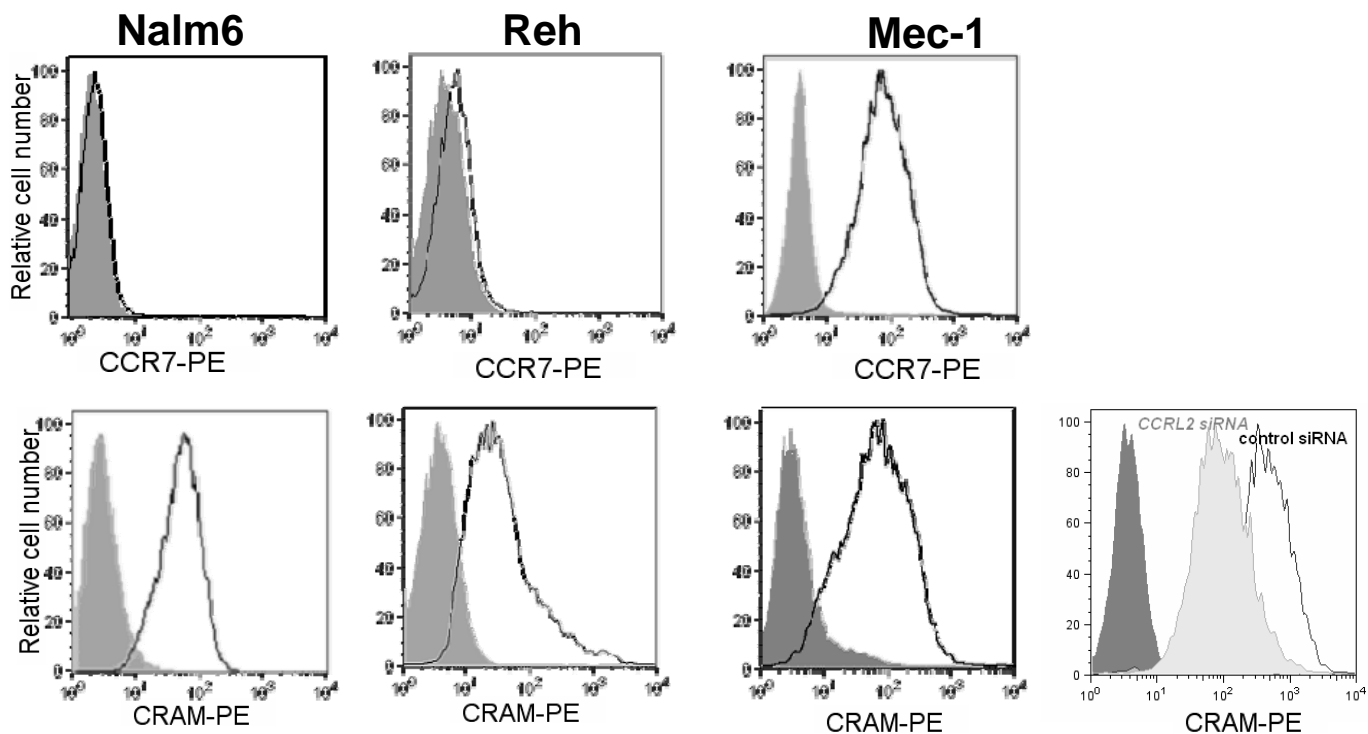**B.**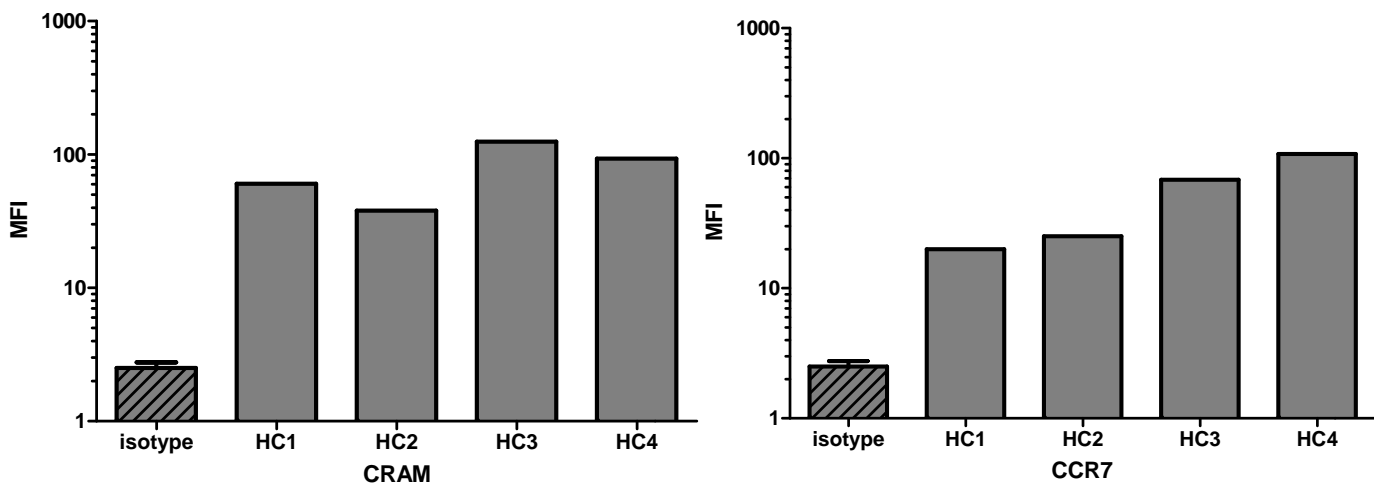

Supplement: MOESM3 [file 9554886]
